# Supplementary material for: A one-step polyol method for well-dispersed and heavily-loaded Ir and Ru catalysts in hydrazine decomposition
Source: Royal Society of Chemistry journal article supplement (doi:10.1039/d2nj05089g), 2023-01-01
Supplement: d2nj05089g1.pdf [file d2nj05089g1.pdf]

## Supplementary Information

### **One-Step Polyol Method for Well-Dispersed and Heavy-Loaded Ir and Ru Catalysts in Hydrazine Decomposition**

*Yuhan Liu<sup>a</sup>, Shuqiang Liang,<sup>b</sup> Zhe Tan,<sup>\*,a</sup> Jun Cheng<sup>c</sup> and Bo Huang<sup>\*,a,d</sup>*

<sup>a</sup>Institute of Chemical Engineering and Technology, Xi'an Jiaotong University, Innovation Harbour, Xi-xian New District, Xi'an 712000, China

<sup>b</sup>Xi'an Aerospace Propulsion Institute, Aerospace Propulsion Technology Research Institute, Feitian Road, Aerospace District, Xi'an 710100, China.

<sup>c</sup>Northwest Institute for Nonferrous Metal Research, Shaanxi Key Laboratory of Biomedical Metal Materials, Xi'an 710016, China.

<sup>d</sup>State Key Laboratory of Structural Chemistry, Fujian Institute of Research on the Structure of Matter, Chinese Academy of Sciences, Fuzhou, Fujian 350002, China

\*Corresponding author: bohuang@xjtu.edu.cn, tanzhe@stu.xjtu.edu.cn.

## 1. Characterization Data

### 1.1 XRPD pattern of commercial Ir/Al<sub>2</sub>O<sub>3</sub>

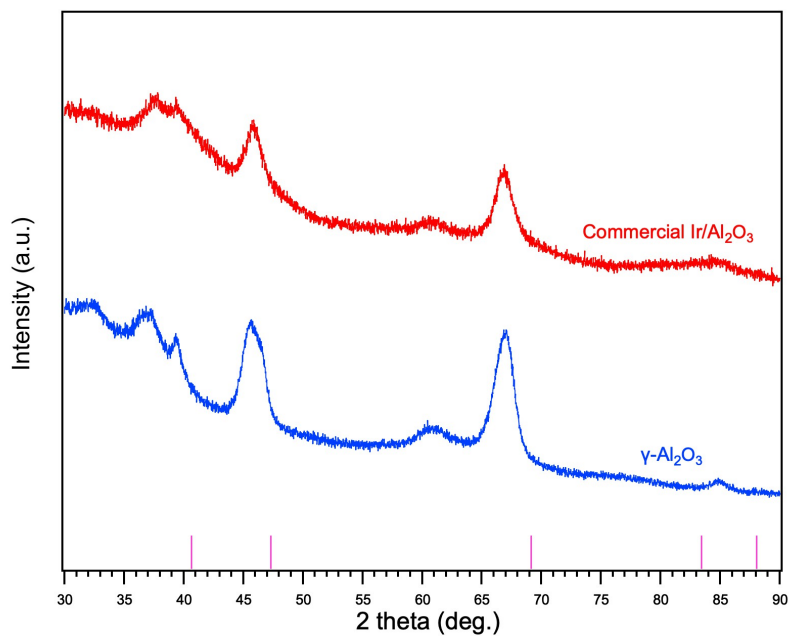

**Fig. S1** XRPD patterns of commercial Ir/Al<sub>2</sub>O<sub>3</sub> (red) and γ-Al<sub>2</sub>O<sub>3</sub> (blue). The pink line is the standard peaks for fcc-Ir (JCPDS no. 06-0598).

### 1.2 TEM and histogram of commercial Ir/Al<sub>2</sub>O<sub>3</sub>

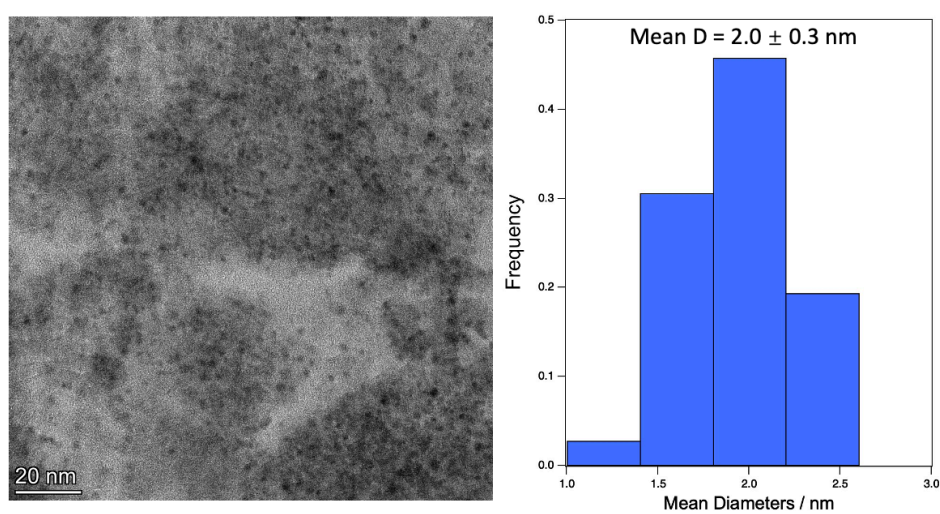

**Fig. S2** TEM image and histogram of commercial Ir/Al<sub>2</sub>O<sub>3</sub>.

## 2. Calculation details

### 2.1 The Apparent Activation Energy for Ir catalyst

From the Arrhenius equation,

$$k = A e^{-E_a/RT}$$

$k$  is the reaction rate constant at reaction temperature,  $A$  is the frequency factor,  $E_a$  is the apparent activation energy,  $T$  is the reaction temperature and  $R$  is the molar gas constant.

Take the logarithm of the formula,

$$\ln k = \ln A - \frac{E_a}{RT}$$

Then Linear fit to the curve consisting of  $k$  values obtained at different temperatures, the trend line equation of Ir catalyst can be calculated as,

$$\ln [k/(\text{mmol g}_{\text{Ir}}^{-1} \text{ h}^{-1})] = -\frac{6361.6}{T} + 31.253 \quad R^2 = 0.9594$$

$$\frac{-E_a}{R} = -6361.6 \text{ K},$$

$$\text{So, } E_a = 6361.6 \text{ K} \times 8.3145 \text{ J K}^{-1} \text{ mol}^{-1} = 52.89 \text{ kJ mol}^{-1} = 0.55 \text{ eV}$$

$$\ln [A/(\text{mmol g}_{\text{Ir}}^{-1} \text{ h}^{-1})] = 31.253$$

$$\text{So, } A = 3.74 \times 10^{13} \text{ mmol g}_{\text{Ir}}^{-1} \text{ h}^{-1}$$

### 2.2 The Apparent Activation Energy for Ru catalyst

From the Arrhenius equation,

$$k = A e^{-E_a/RT}$$

$k$  is the reaction rate constant at reaction temperature,  $A$  is the frequency factor,  $E_a$  is the apparent activation energy,  $T$  is the reaction temperature and  $R$  is the molar gas constant.

Take the logarithm of the formula,

$$\ln k = \ln A - \frac{E_a}{RT}$$

Then Linear fit to the curve consisting of  $k$  values obtained at different temperatures, the trend line equation of Ru catalyst can be calculated as,

$$\ln[k/(\text{mmol g}_{\text{Ru}}^{-1} \text{ h}^{-1})] = -\frac{5242.2}{T} + 24.943 \quad R^2 = 0.9733$$

$$\frac{-E_a}{R} = -5242.2 \text{ K},$$

$$\text{So, } E_a = 5242.2 \text{ K} \times 8.3145 \text{ J K}^{-1} \text{ mol}^{-1} = 45.26 \text{ kJ mol}^{-1} = 0.47 \text{ eV}$$

$$\ln[A/(\text{mmol g}_{\text{Ru}}^{-1} \text{ h}^{-1})] = 24.943$$

$$\text{So, } A = 6.80 \times 10^{10} \text{ mmol g}_{\text{Ru}}^{-1} \text{ h}^{-1}$$
